# Supplementary material for: Similarity of therapeutic networks induced by a multi-component herbal remedy, Ukgansan, in neurovascular unit cells
Source: PubMed Central journal article supplement (PMC7021700; doi:10.1038/s41598-020-59537-8), 2020-02-14
Supplement: 41598_2020_59537_MOESM1_ESM.pdf [file 41598_2020_59537_MOESM1_ESM.pdf]

## [Supplementary Information]

### **Similarity of therapeutic networks induced by a multi-component herbal remedy, Ukgansan, in neurovascular unit cells**

Bu-Yeo Kim<sup>1,\*</sup>; Hye-Sun Lim<sup>1</sup>; Yu Jin Kim<sup>1,2</sup>; Eunjin Sohn<sup>1</sup>; Yun Hee Kim<sup>1</sup>; Imhoi Koo<sup>3</sup>; Soo-Jin Jeong<sup>1,\*</sup>

<sup>1</sup> Herbal Medicine Research Division, Korea Institute of Oriental Medicine, 1672 Yuseong-daero, Yuseong-gu, Daejeon, 34054, Republic of Korea

<sup>2</sup> College of Pharmacy, Chungnam National University, 99 Daehak-ro, Yuseong-gu, Daejeon 34134, Republic of Korea

<sup>3</sup> Huck Institutes of Life Sciences, Pennsylvania State University, University Park, PA 16802, United States of America

\* Co-correspondence

Bu-Yeo Kim, PhD: buykim@kiom.re.kr

Soo-Jin Jeong, PhD: sjjeong@kiom.re.kr

Herbal Medicine Research Division, Korea Institute of Oriental Medicine,  
1672 Yuseong-daero, Yuseong-gu, Daejeon, 34054, Republic of Korea  
Phone: +82 42 868 9401, Fax: + 82 42 868 947

**Supplementary Table 1.** Biological properties of the herbal components of UGS.

| Scientific name              | Symbol | Biological properties                                                              | Supplementary References |
|------------------------------|--------|------------------------------------------------------------------------------------|--------------------------|
| <i>Uncaria sinensis</i>      | C1     | Neuroprotection, Anti neuroinflammation                                            | [1~4]                    |
| <i>Atractylodes japonica</i> | C2     | Neuroprotection, Anti neuroinflammation, Anti nociception, Promote differentiation | [5~9]                    |
| <i>Poria cocos</i>           | C3     | Neuroprotection, Immune modulation                                                 | [10~12]                  |
| <i>Bupleurum falcatum</i>    | C4     | Anti neuroinflammation, Antioxidant, Antidepressant                                | [13~17]                  |
| <i>Angelica gigas</i>        | C5     | Neuroprotection, Anti inflammation, Growth inhibition                              | [18~21]                  |
| <i>Cnidium officinale</i>    | C6     | Antioxidant, Anti neuroinflammation, Anticancer                                    | [22~26]                  |
| <i>Glycyrrhiza uralensis</i> | C7     | Bioactive Constituents, Anti inflammation, Detoxification, Immune modulation       | [27~30]                  |

### Supplementary References

- [1] Seo, H. B. et al. Partially purified components of *Uncaria sinensis* attenuate blood brain barrier disruption after ischemic brain injury in mice. *BMC Complement. Altern. Med.* **15**, 157 (2015).
- [2] Kang, B. K. et al. Anti-Neuroinflammatory Effects of *Uncaria sinensis* in LPS-Stimulated BV2 Microglia Cells and Focal Cerebral Ischemic Mice. *Am. J. Chin. Med.* **43**, 1099-115 (2015).
- [3] Jang, J. Y. et al. Hexane extract from *Uncaria sinensis* exhibits anti-apoptotic properties against glutamate-induced neurotoxicity in primary cultured cortical neurons. *Int. J. Mol. Med.* **30**, 1465-1472 (2012).
- [4] Shi, Z. et al Neuroprotective effects of aqueous extracts of *Uncaria tomentosa*: Insights from 6-OHDA induced cell damage and transgenic *Caenorhabditis elegans* model. *Neurochem. Int.* **62**, 940-947 (2013).
- [5] Han, Y., Jung, H. W. & Park, Y. K. The roots of *Atractylodes japonica* Koidzumi promote adipogenic differentiation via activation of the insulin signaling pathway in 3T3-L1 cells. *BMC Complement. Altern. Med.* **12**, 154 (2012).
- [6] Chen, L. G. et al. Anti-inflammatory and Antinociceptive Constituents of *Atractylodes japonica* Koidzumi. *J. Agric. Food. Chem.* **64**, 2254-2262 (2016).
- [7] Liu, C., Zhao, H., Ji, Z. H. & Yu, X. Y. Neuroprotection of atractylenolide III from *Atractylodis macrocephalae* against glutamate-induced neuronal apoptosis via inhibiting caspase signaling pathway. *Neurochem. Res.* **39**, 1753-1758 (2014).
- [8] Gao, Q., Ji, Z. H., Yang, Y., Cheng, R. & Yu, X. Y. Neuroprotective effect of *Rhizoma Atractylodis macrocephalae* against excitotoxicity-induced apoptosis in cultured cerebral cortical neurons. *Phytother. Res.* **26**, 557-561 (2012).
- [9] Zhao, H., Ji, Z. H., Liu, C. & Yu, X. Y. Neuroprotection and mechanisms of atractylenolide III in preventing learning and memory impairment induced by chronic high-dose homocysteine administration in rats. *Neuroscience* **290**, 485-491 (2015).

- [10] Park, Y. H. et al. Poria cocos water extract (PCW) protects PC12 neuronal cells from beta-amyloid-induced cell death through antioxidant and antiapoptotic functions. *Pharmazie*. **64**, 760-764 (2009).
- [11] Ríos, J. L. Chemical constituents and pharmacological properties of Poria cocos. *Planta Med.* **77**, 681-691 (2011).
- [12] Cheng, S., Eliaz, I., Lin, J., Thyagarajan-Sahu, A. & Sliva, D. Triterpenes from Poria cocos suppress growth and invasiveness of pancreatic cancer cells through the downregulation of MMP-7. *Int. J. Oncol.* **42**, 1869-1874 (2013).
- [13] Lee, B., Yun, H. Y., Shim, I., Lee, H. & Hahm, D. H. Bupleurum falcatum prevents depression and anxiety-like behaviors in rats exposed to repeated restraint stress. *J. Microbiol. Biotechnol.* **22**, 422-430 (2012).
- [14] Kim, S. M., Kim, S. C., Chung, I. K., Cheon, W. H. & Ku, S. K. Antioxidant and Protective Effects of Bupleurum falcatum on the L-Thyroxine-Induced Hyperthyroidism in Rats. *Evid. Based Complement. Alternat. Med.* **2012**, 578497 (2012).
- [15] Park, W. H. et al. Ethanol extract of Bupleurum falcatum and saikosaponins inhibit neuroinflammation via inhibition of NF- $\kappa$ B. *J. Ethnopharmacol.* **174**, 37-44 (2015).
- [16] Kwon, S. et al. Antidepressant-like effect of the methanolic extract from Bupleurum falcatum in the tail suspension test. *Prog. Neuropsychopharmacol. Biol. Psychiatry* **34**, 265-270 (2010).
- [17] Lee, J. Y., Kim, H. S., Oh, T. H. & Yune, T. Y. Ethanol Extract of Bupleurum falcatum Improves Functional Recovery by Inhibiting Matrix Metalloproteinases-2 and -9 Activation and Inflammation after Spinal Cord Injury. *Exp. Neurobiol.* **19**, 146-154 (2010).
- [18] Cho, J. H., Kwon, J. E., Cho, Y., Kim, I. & Kang, S. C. Anti-Inflammatory Effect of Angelica gigas via Heme Oxygenase (HO)-1 Expression. *Nutrients* **7**, 4862-4874 (2015).
- [19] Sowndhararajan, K. & Kim, S. Neuroprotective and Cognitive Enhancement Potentials of Angelica gigas Nakai Root: A Review. *Sci. Pharm.* **85**, pii: E21 (2017).
- [20] Jeon, Y. J., et al. Angelica gigas Nakai Has Synergetic Effects on Doxorubicin-Induced Apoptosis. *Biomed. Res. Int.* **2018**, 6716547 (2018).
- [21] Jang, J. Y. et al. An ethanolic extract of Angelica gigas improves atherosclerosis by inhibiting vascular smooth muscle cell proliferation. *Lab. Anim. Res.* **30**, 84-89 (2014).
- [22] Ramalingam, M. & Yong-Ki, P. Free radical scavenging activities of Cnidium officinale Makino and Ligusticum chuanxiong Hort. methanolic extracts. *Pharmacogn. Mag.* **6**, 323-330 (2010).
- [23] de la Cruz, J., Kim, D. H. & Hwang, S. G. Anticancer effects of Cnidium officinale Makino extract mediated through apoptosis and cell cycle arrest in the HT-29 human colorectal cancer cell line. *Asian Pac. J. Cancer Prev.* **15**, 5117-5121 (2014).
- [24] Lee, Y. M. et al. Cnidium officinale extract and butylidenephthalide inhibits retinal neovascularization in vitro and in vivo. *BMC Complement. Altern. Med.* **16**, 231 (2016).
- [25] Bae, K. E., Choi, Y. W., Kim, S. T. & Kim, Y. K. Components of rhizome extract of Cnidium officinale Makino and their in vitro biological effects. *Molecules* **16**, 8833-8847 (2011).
- [26] Lee, S. H. et al. Ethanol extract of Cnidium officinale exhibits anti-inflammatory effects in BV2 microglial cells by suppressing NF- $\kappa$ B nuclear translocation and the activation of the PI3K/Akt signaling pathway. *Int. J. Mol. Med.* **32**, 876-882 (2013).
- [27] Tanemoto, R. et al. The constituents of licorice (*Glycyrrhiza uralensis*) differentially suppress nitric oxide production in interleukin-1 $\beta$ -treated hepatocytes. *Biochem. Biophys. Rep.* **2**, 153-159 (2015).

- [28] Ji, S. et al. Bioactive Constituents of Glycyrrhiza uralensis (Licorice): Discovery of the Effective Components of a Traditional Herbal Medicine. *Nat. Prod.* **79**, 281-292 (2016).
- [29] Yang, N. et al. Glycyrrhiza uralensis flavonoids present in anti-asthma formula, ASHMI™, inhibit memory Th2 responses in vitro and in vivo. *Phytother. Res.* **27**, 1381-1391 (2013).
- [30] Gong, H. et al. A protective mechanism of licorice (Glycyrrhiza uralensis): isoliquiritigenin stimulates detoxification system via Nrf2 activation. *J. Ethnopharmacol.* **162**, 134-139 (2015).



**Supplementary Table 2.** List of enriched pathways from SPIA based on the phosphorylation levels of signaling proteins.

| Pathways                                                   | FDR      |          |          |
|------------------------------------------------------------|----------|----------|----------|
|                                                            | HT22     | BV-2     | HBVP     |
| Pathways in cancer                                         | 7.13E-14 | 6.81E-17 | 2.09E-04 |
| Viral carcinogenesis                                       | 1.44E-09 | 2.23E-07 | 7.80E-03 |
| Pancreatic cancer                                          | 7.15E-09 | 1.20E-06 | 1.07E-03 |
| Prostate cancer                                            | 1.60E-08 | 2.11E-10 | 4.62E-04 |
| Focal adhesion                                             | 1.90E-07 | 2.74E-07 | 1.77E-02 |
| ErbB signaling pathway                                     | 3.06E-07 | 9.01E-10 | 2.52E-02 |
| Osteoclast differentiation                                 | 3.06E-07 | 1.92E-07 | 3.02E-02 |
| Acute myeloid leukemia                                     | 4.68E-07 | 1.92E-07 | 4.81E-03 |
| Chemokine signaling pathway                                | 4.68E-07 | 2.74E-07 | 2.52E-02 |
| Epstein-Barr virus infection                               | 4.68E-07 | 6.06E-11 | 5.52E-03 |
| Tuberculosis                                               | 4.68E-07 | 3.84E-07 | 1.52E-02 |
| MAPK signaling pathway                                     | 6.24E-07 | 6.91E-10 | 4.81E-03 |
| Endometrial cancer                                         | 4.32E-06 | 1.79E-04 | 1.05E-02 |
| Chronic myeloid leukemia                                   | 4.32E-06 | 6.00E-06 | 3.00E-04 |
| Neurotrophin signaling pathway                             | 7.91E-06 | 1.01E-06 | 1.62E-03 |
| HTLV-I infection                                           | 2.07E-05 | 3.65E-06 | 6.83E-04 |
| Measles                                                    | 2.26E-05 | 2.97E-06 | 4.17E-02 |
| VEGF signaling pathway                                     | 2.76E-05 | 1.01E-06 | 8.81E-03 |
| Cytokine-cytokine receptor interaction                     | 4.74E-05 | 9.36E-03 | 1.49E-02 |
| Adipocytokine signaling pathway                            | 5.09E-05 | 3.50E-03 | 4.62E-04 |
| Hepatitis C                                                | 5.17E-05 | 6.92E-07 | 5.52E-03 |
| Epithelial cell signaling in Helicobacter pylori infection | 6.83E-05 | 9.33E-05 | 2.23E-02 |
| Influenza A                                                | 9.81E-05 | 1.32E-05 | 8.81E-03 |
| Toxoplasmosis                                              | 1.38E-04 | 1.92E-07 | 5.46E-03 |
| Small cell lung cancer                                     | 1.61E-04 | 4.70E-03 | 1.53E-03 |
| Glioma                                                     | 1.95E-04 | 1.86E-04 | 2.19E-02 |
| Insulin signaling pathway                                  | 1.86E-04 | 4.28E-07 | 1.07E-03 |
| Regulation of actin cytoskeleton                           | 1.91E-04 | 3.25E-03 | 2.44E-02 |
| Non-small cell lung cancer                                 | 2.01E-04 | 2.16E-03 | 2.87E-02 |
| Colorectal cancer                                          | 2.24E-04 | 5.26E-04 | 2.39E-03 |
| Cell cycle                                                 | 2.58E-04 | 8.97E-05 | 5.52E-03 |
| Jak-STAT signaling pathway                                 | 2.46E-04 | 2.27E-03 |          |
| GnRH signaling pathway                                     | 2.67E-04 | 5.60E-06 |          |
| Chagas disease (American trypanosomiasis)                  | 6.35E-04 | 2.07E-03 | 4.81E-03 |
| Transcriptional misregulation in cancer                    | 6.35E-04 | 2.67E-02 | 2.19E-02 |
| Herpes simplex infection                                   | 6.60E-04 | 7.00E-03 | 2.35E-02 |
| T cell receptor signaling pathway                          | 8.84E-04 | 4.57E-07 | 2.87E-02 |
| Amyotrophic lateral sclerosis (ALS)                        | 1.04E-03 | 9.39E-04 | 1.38E-02 |
| Calcium signaling pathway                                  | 1.56E-03 | 2.69E-02 | 2.37E-02 |
| Natural killer cell mediated cytotoxicity                  | 1.30E-03 | 2.07E-04 |          |
| Shigellosis                                                | 1.76E-03 | 5.54E-03 | 4.56E-03 |
| Pathogenic Escherichia coli infection                      | 1.78E-03 |          | 5.52E-03 |
| mTOR signaling pathway                                     | 1.92E-03 | 1.29E-02 | 1.62E-03 |
| Tight junction                                             | 2.28E-03 | 3.49E-02 | 2.56E-03 |
| B cell receptor signaling pathway                          | 3.35E-03 | 2.54E-04 | 1.77E-02 |
| Toll-like receptor signaling pathway                       | 3.55E-03 | 1.54E-04 | 4.95E-03 |

| Pathways                                               | FDR      |          |          |
|--------------------------------------------------------|----------|----------|----------|
|                                                        | HT22     | BV-2     | HBVP     |
| Melanoma                                               | 3.85E-03 | 3.45E-04 | 2.47E-02 |
| Leukocyte transendothelial migration                   | 5.51E-03 |          | 1.85E-02 |
| Apoptosis                                              | 5.54E-03 | 3.01E-02 | 4.64E-03 |
| Bacterial invasion of epithelial cells                 | 5.54E-03 | 2.89E-02 |          |
| NF-kappa B signaling pathway                           | 6.32E-03 | 2.16E-05 | 2.52E-02 |
| Aldosterone-regulated sodium reabsorption              | 5.08E-03 | 4.79E-02 | 5.52E-03 |
| Oocyte meiosis                                         | 8.07E-03 | 1.34E-03 | 2.52E-02 |
| Dopaminergic synapse                                   | 8.78E-03 | 7.65E-03 | 1.31E-02 |
| Wnt signaling pathway                                  | 9.25E-03 | 3.61E-02 | 1.44E-02 |
| Amphetamine addiction                                  | 1.31E-02 |          | 9.60E-03 |
| Fc epsilon RI signaling pathway                        | 1.31E-02 | 1.30E-05 | 4.38E-02 |
| Fc gamma R-mediated phagocytosis                       | 1.59E-02 | 1.34E-03 | 4.13E-02 |
| Progesterone-mediated oocyte maturation                | 1.59E-02 | 2.16E-05 | 1.22E-02 |
| Bladder cancer                                         | 1.62E-02 | 1.38E-02 |          |
| Melanogenesis                                          | 1.83E-02 | 8.28E-03 | 4.38E-02 |
| Cocaine addiction                                      | 1.93E-02 | 3.85E-02 | 1.77E-02 |
| Alzheimer's disease                                    | 1.94E-02 | 3.10E-02 | 9.60E-03 |
| Gap junction                                           | 1.74E-02 | 3.49E-02 | 1.67E-02 |
| Amoebiasis                                             | 1.76E-02 |          |          |
| Leishmaniasis                                          | 1.76E-02 | 6.96E-03 |          |
| Gastric acid secretion                                 | 1.43E-02 |          |          |
| Huntington's disease                                   | 1.67E-02 |          | 5.46E-03 |
| Pertussis                                              | 1.87E-02 | 1.86E-02 |          |
| Viral myocarditis                                      | 1.87E-02 |          | 9.60E-03 |
| Renal cell carcinoma                                   | 2.37E-02 | 1.29E-02 |          |
| Thyroid cancer                                         | 2.55E-02 |          | 2.19E-02 |
| Salmonella infection                                   | 2.83E-02 | 3.41E-03 |          |
| Cholinergic synapse                                    | 2.89E-02 |          |          |
| TGF-beta signaling pathway                             | 2.06E-02 |          | 2.42E-02 |
| Long-term depression                                   | 2.19E-02 | 1.34E-03 | 3.14E-02 |
| NOD-like receptor signaling pathway                    | 2.66E-02 | 5.37E-04 | 2.23E-02 |
| Long-term potentiation                                 | 3.86E-02 | 8.31E-03 | 2.63E-02 |
| p53 signaling pathway                                  | 4.46E-02 | 1.41E-02 | 1.76E-02 |
| Cytosolic DNA-sensing pathway                          | 4.57E-02 | 1.25E-02 | 5.52E-03 |
| Alcoholism                                             | 4.41E-02 | 3.94E-05 | 1.49E-02 |
| Vascular smooth muscle contraction                     |          | 1.03E-03 | 3.96E-02 |
| Type II diabetes mellitus                              |          | 2.23E-02 | 2.39E-03 |
| Axon guidance                                          |          | 1.34E-02 |          |
| Antigen processing and presentation                    |          | 2.56E-02 |          |
| RIG-I-like receptor signaling pathway                  |          | 2.74E-02 | 1.38E-02 |
| Retrograde endocannabinoid signaling                   |          | 2.39E-02 |          |
| Glutamatergic synapse                                  |          | 2.52E-02 |          |
| Dorso-ventral axis formation                           |          | 3.54E-02 |          |
| Arrhythmogenic right ventricular cardiomyopathy (ARVC) |          | 3.08E-02 | 1.49E-02 |
| Legionellosis                                          |          |          | 4.81E-03 |
| Parkinson's disease                                    |          |          | 5.52E-03 |
| Carbohydrate digestion and absorption                  |          |          | 2.96E-02 |



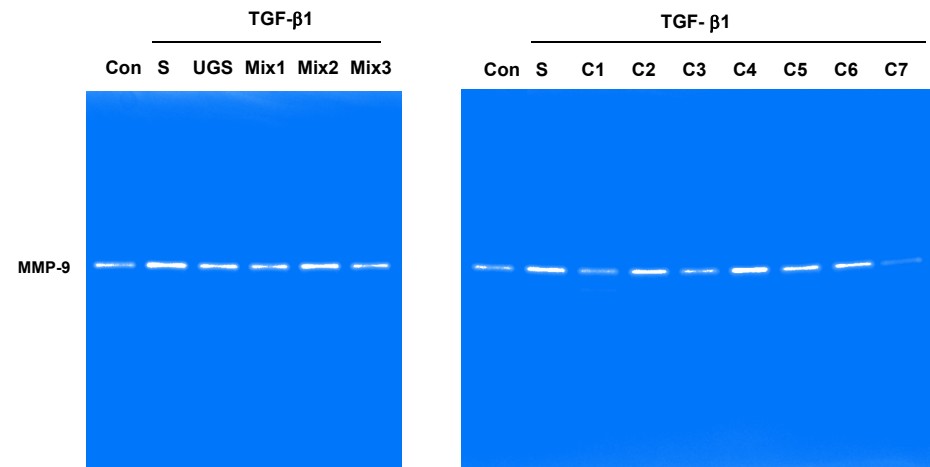

**Supplementary Fig. S1. Full length images of gels of Fig. 1c.** HBVP cells were treated with TGF- $\beta$ 1 (10 ng/mL) and each herbal extract for 24 h. MMP-9 enzymatic activity was assessed by gelatin zymography using the culture supernatants of each sample. Areas of gelatinase activity were detected as clear bands against the blue-stained gelatin background. Con represents untreated control samples and S represents TGF- $\beta$ 1-treated samples.

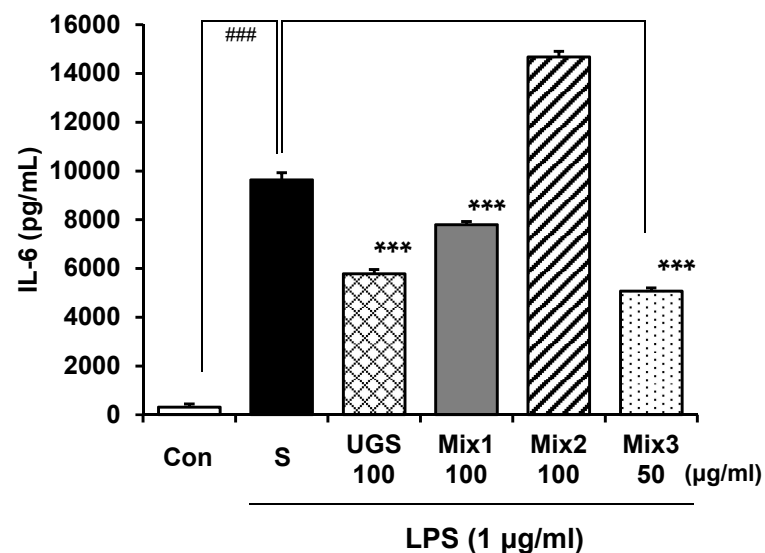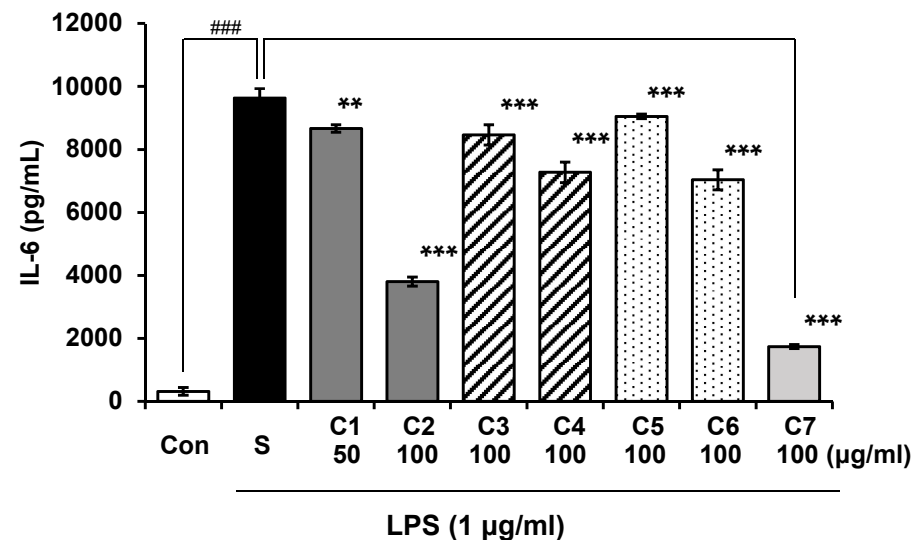

**Supplementary Fig. S2.** Effects of UGS and its herbal components on LPS-stimulated BV-2 microglia. BV-2 microglial cells were pretreated with each herbal extract for 2 h and then stimulated with LPS (1 µg/mL) for an additional 22 h. The supernatants were collected and applied to ELISA for IL-6. The left panel presents the effects of UGS and the 3 herbal component mixtures (Mix), while the right panel presents the effects of individual herbal components (C1–C7). The white bar (Con) represents untreated control samples and the black bar (S) represents LPS-stimulated samples. Data represent the mean ± standard error of 3 independent experiments. ###p < 0.01 vs untreated cells; \*p < 0.05, \*\*p < 0.01 or \*\*\*p < 0.001 vs LPS-stimulated cells.

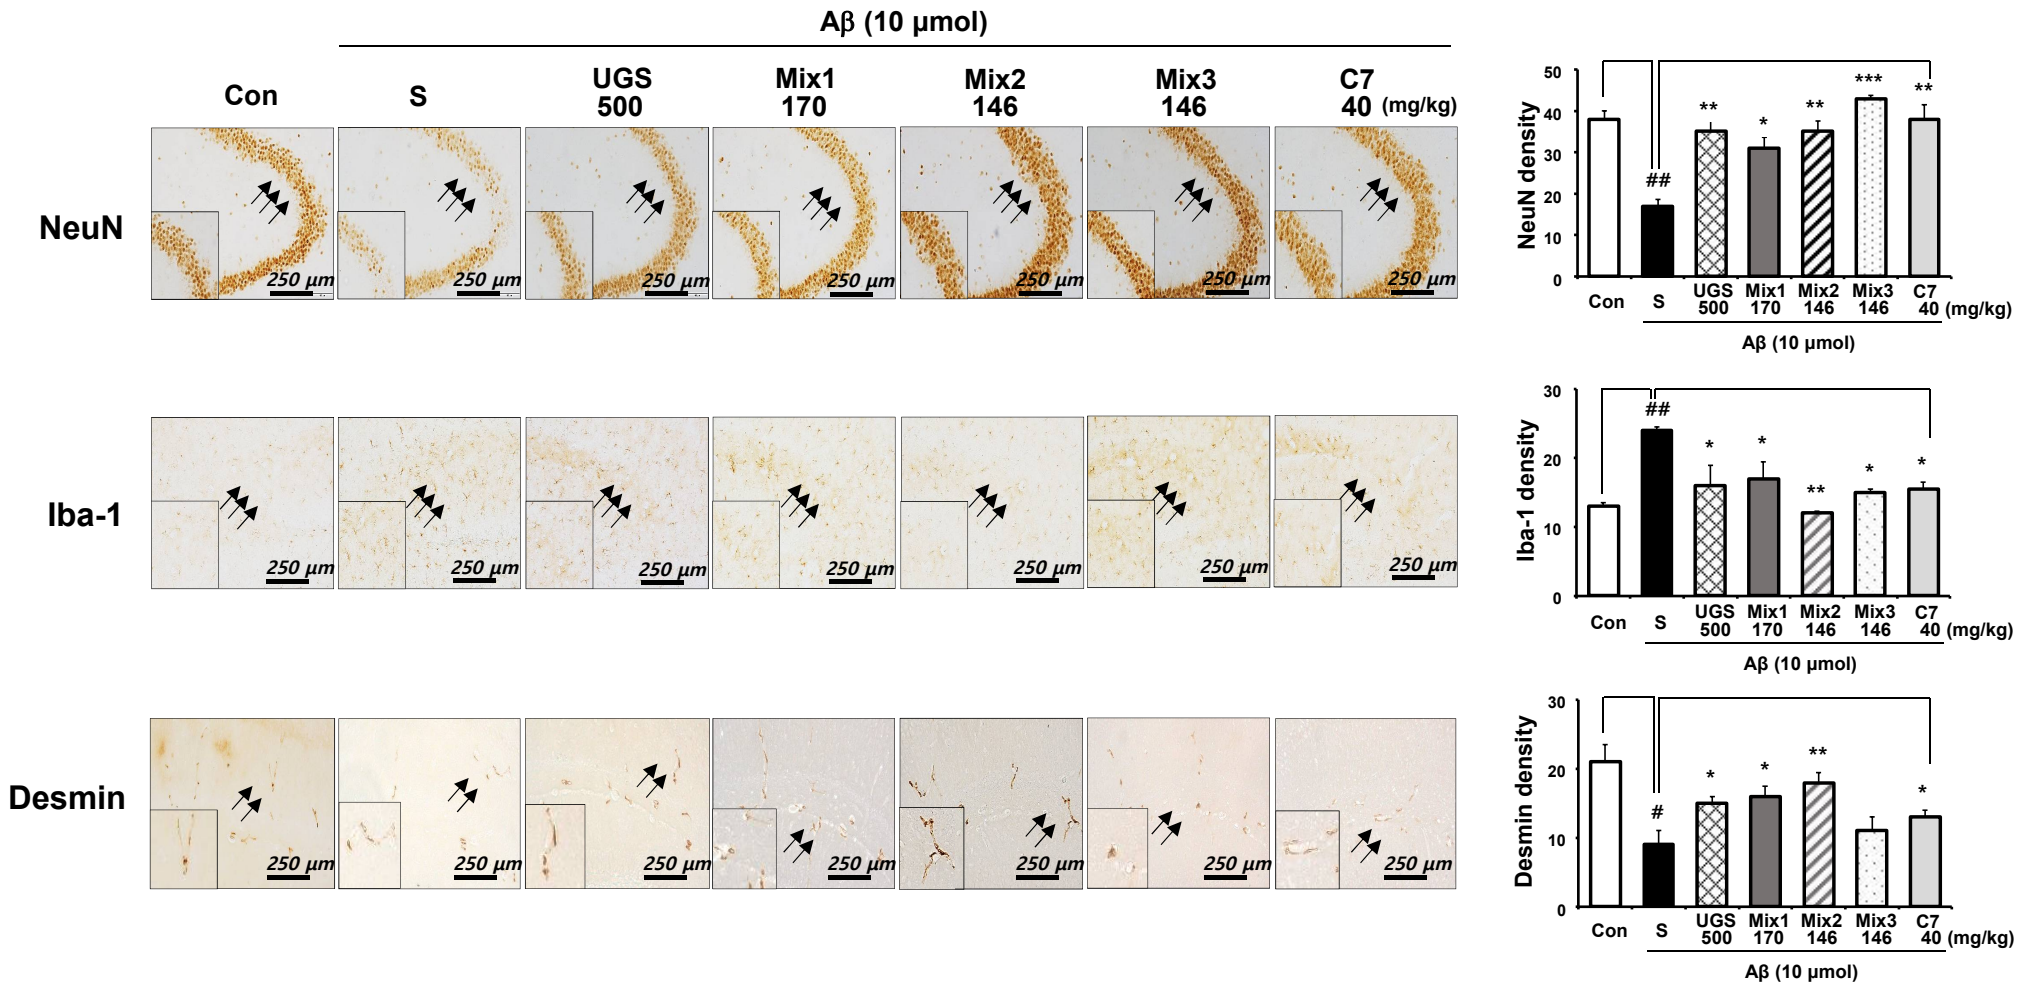

**Supplementary Fig. S3. Effects of UGS and its herbal components on the A $\beta$ -induced mouse model of Alzheimer's disease.** For the immunohistochemistry (IHC) assay, A $\beta$  aggregates (10  $\mu$ mol per 10% dimethyl sulfoxide in PBS) were injected into the intracerebroventricular (ICV) region of ICR mice in stereotaxic coordinates. Vehicle or each herbal extract was orally administered for 21 days. Expressions of NeuN and desmin in the hippocampus and Iba-1 in the cortex were determined by IHC (magnification,  $\times 200$ ) and then quantified using ImageJ as shown in right panel. Data represent the mean  $\pm$  standard error of 3 independent experiments. ### $p$  < 0.01 vs untreated samples; \* $p$  < 0.05, \*\* $p$  < 0.01 or \*\*\* $p$  < 0.001 vs A $\beta$ -stimulated samples. The length of the scale bar indicates 250  $\mu$ m.

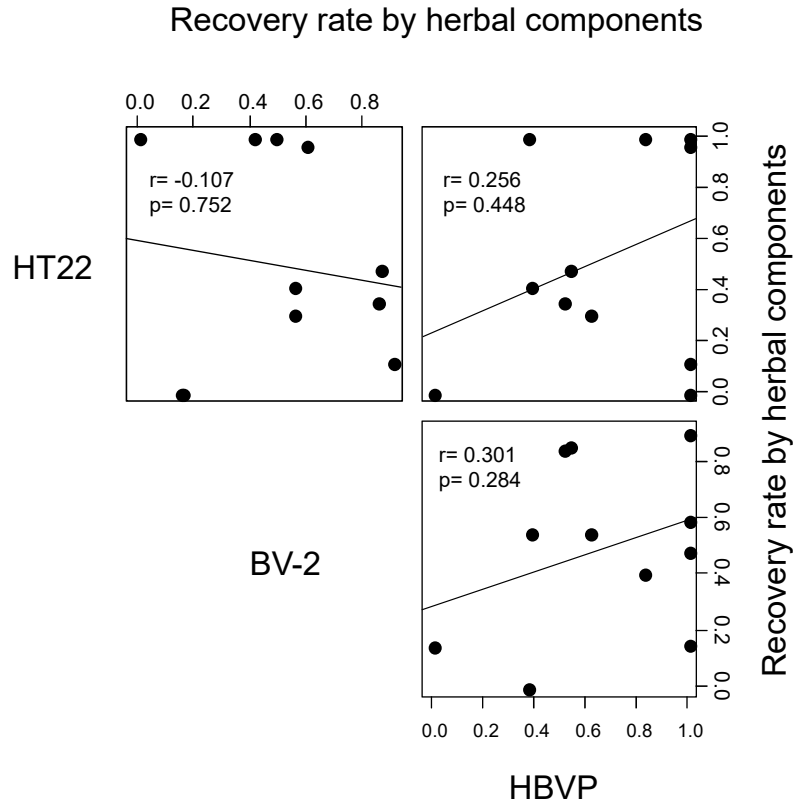

**Supplementary Fig. S4. Therapeutic similarities between neurovascular cell types based on in vitro experiments.** HT22, BV-2, and HBVP cells exposed to H<sub>2</sub>O<sub>2</sub>, LPS, and TGF-β1, respectively were treated with each herbal component. For HT22 cells, cytotoxicity was determined by the CCK assay. For BV-2 cells, the amount of TNF-α was measured. For HBVP cells, MMP-9 enzymatic activity was assessed. The therapeutic effect of each herbal component was measured as recovery ratio compared with untreated cells, then compared among neurovascular cell types.

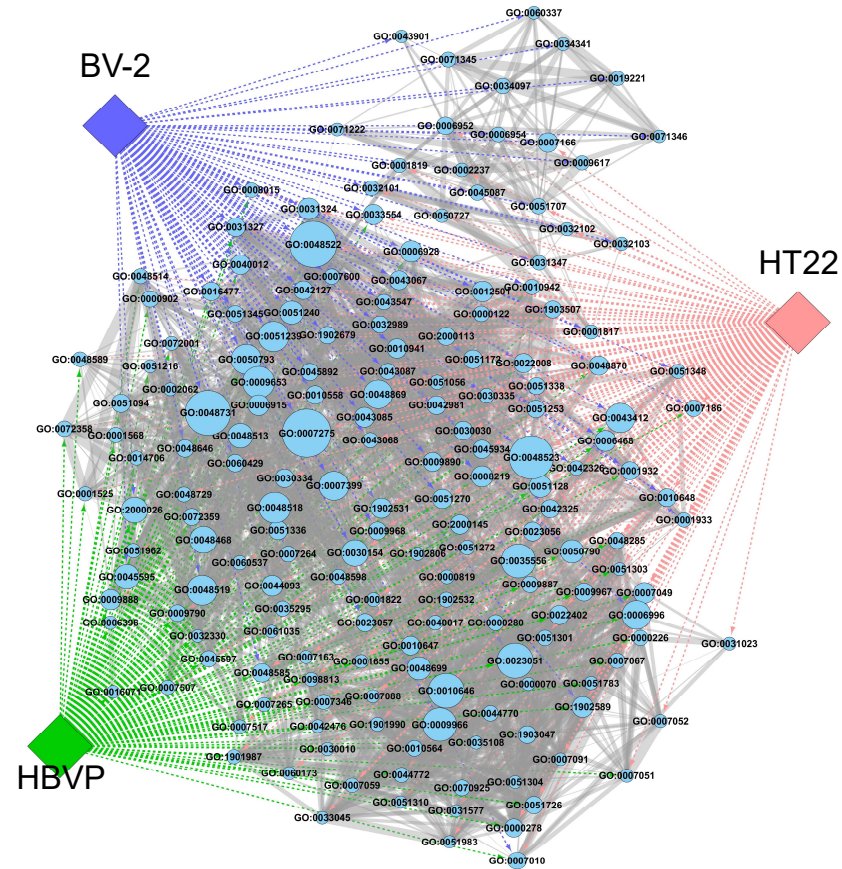

**Supplementary Fig. S5. Functional connections between neurovascular cells based on gene expression.** HT22, BV-2, and HBVP cells were exposed to H<sub>2</sub>O<sub>2</sub>, LPS, and TGF- $\beta$ 1, respectively. Total RNA extracts from cultivated cells were analyzed by RNA-seq technology. Gene expression levels were compared with those of control cells to obtain expression ratios. Genes showing expression ratios above 2 or below 0.5 in each experimental condition were identified as DEGs. GO terms associated with DEGs from each stimulated neurovascular cell type were identified with DAVID, and redundancies removed using ReviGO. The resultant GO terms were connected with each other based on the common genes ( $p < 0.001$ ) included in each pair of GO terms, as determined by the Enrichment Map. Node size and edge thickness represent the number of genes included in a GO term and shared by a pair of GO terms, respectively.



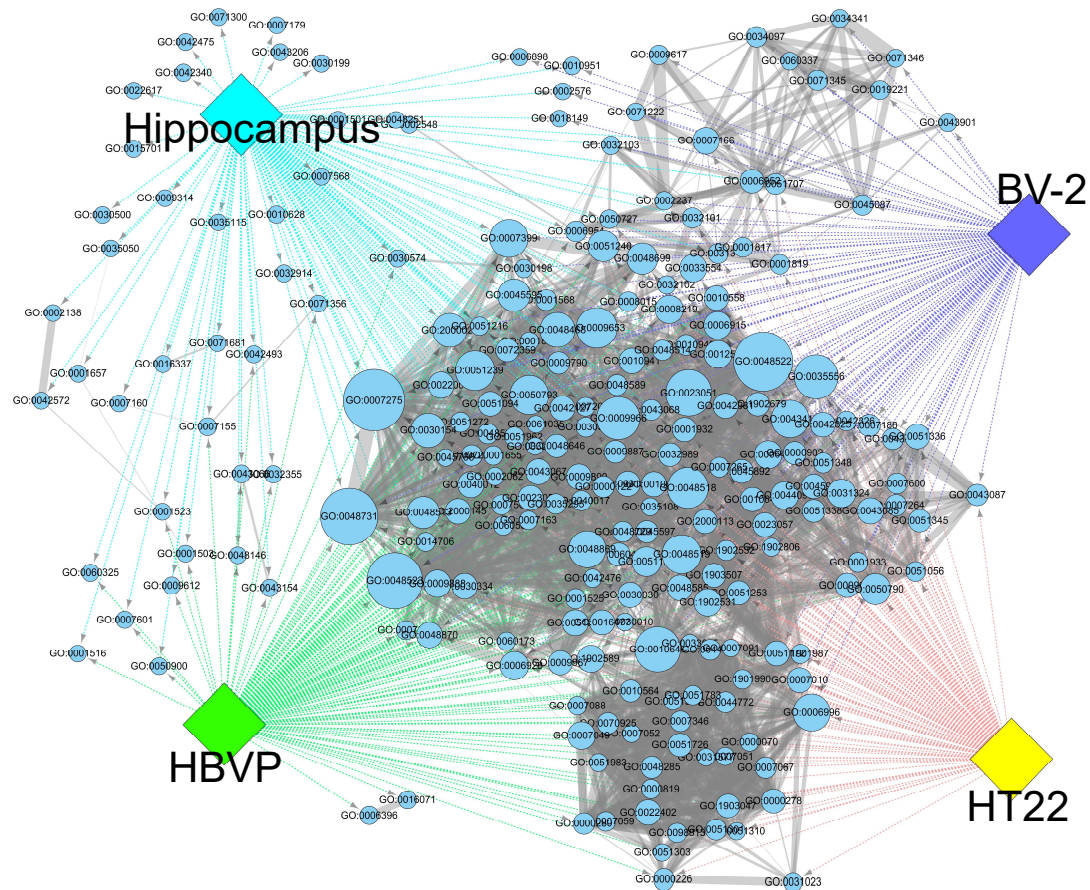

**Supplementary Fig. S6. Functional connections between neurovascular cells and mouse hippocampus based on gene expression.** HT22, BV-2, and HBVP cells were exposed to H<sub>2</sub>O<sub>2</sub>, LPS, and TGF-β1, respectively. Mice were injected with Aβ into the intracerebroventricular (ICV) region. Total RNA extracts from cultivated cells and mouse hippocampus were analyzed by RNA-seq technology. Gene expression levels were compared with those of control cells to obtain expression ratios. Genes showing expression ratios above 2 or below 0.5 in each experimental condition were identified as DEGs. GO terms associated with DEGs from each stimulated neurovascular cell type were identified with DAVID and redundancies removed using ReviGO. The resultant GO terms were connected with each other based on the common genes ( $p < 0.001$ ) included in each pair of GO terms, as determined by the Enrichment Map. Node size and edge thickness represent the number of genes included in a GO term and shared by a pair of GO terms, respectively.



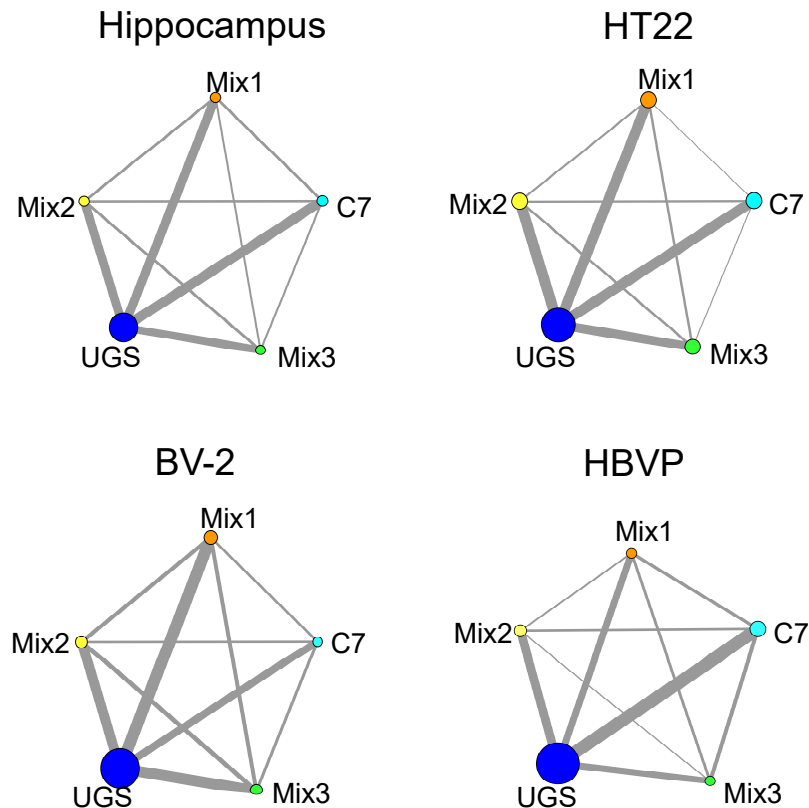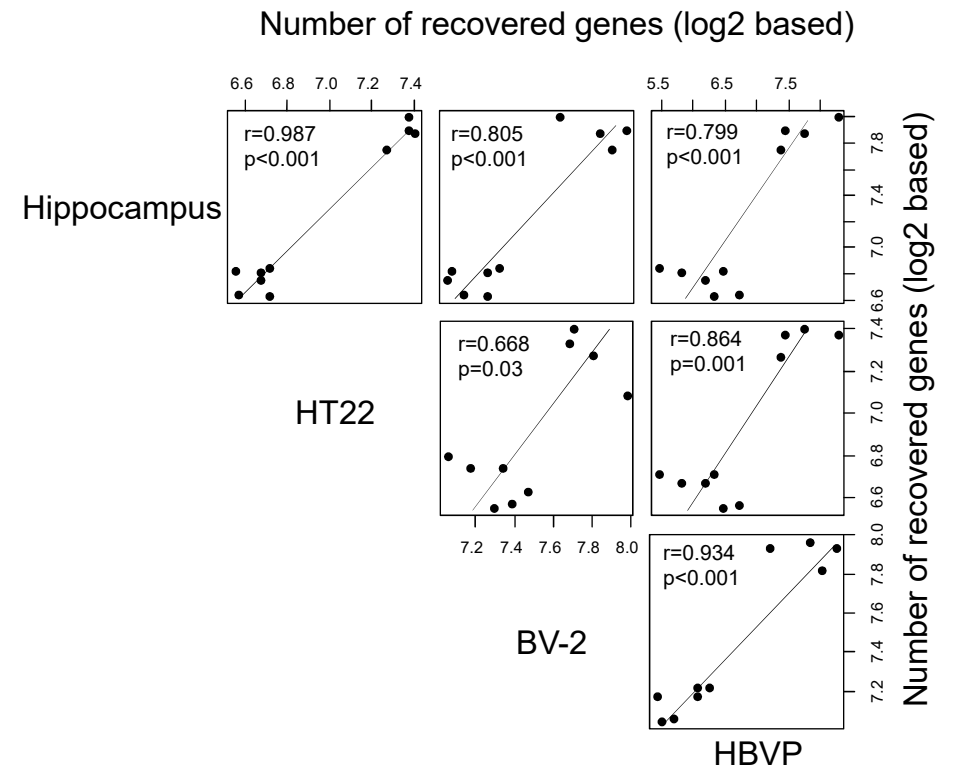

**Supplementary Fig. S7. Therapeutic similarities between neurovascular cell types based on gene expression.** Gene expression ratios were measured in HT22, BV-2, and HBVP cells exposed to H<sub>2</sub>O<sub>2</sub>, LPS, and TGF- $\beta$ 1, respectively, by RNA-seq technology. For hippocampal tissue, mice were injected with A $\beta$  into the intracerebroventricular (ICV) region. DEGs were defined as genes showing expression ratios above 2 or below 0.5 in each stimulated neurovascular cell type. Recovered genes were defined as those whose expression levels were restored to normal level (expression ratio between 0.5 and 2). By measuring the similarity between each pair of herbal components (Mix1, Mix2, Mix3, and C7) in terms of commonly recovered genes, therapeutic networks were constructed. Node size and edge thickness represent the number of genes recovered by each herbal component and the number of shared recovered genes between two herbal components, respectively. The structure of the therapeutic network obtained from each neurovascular cell type was then compared with those from other cell types to obtain correlation patterns between neurovascular cell types.

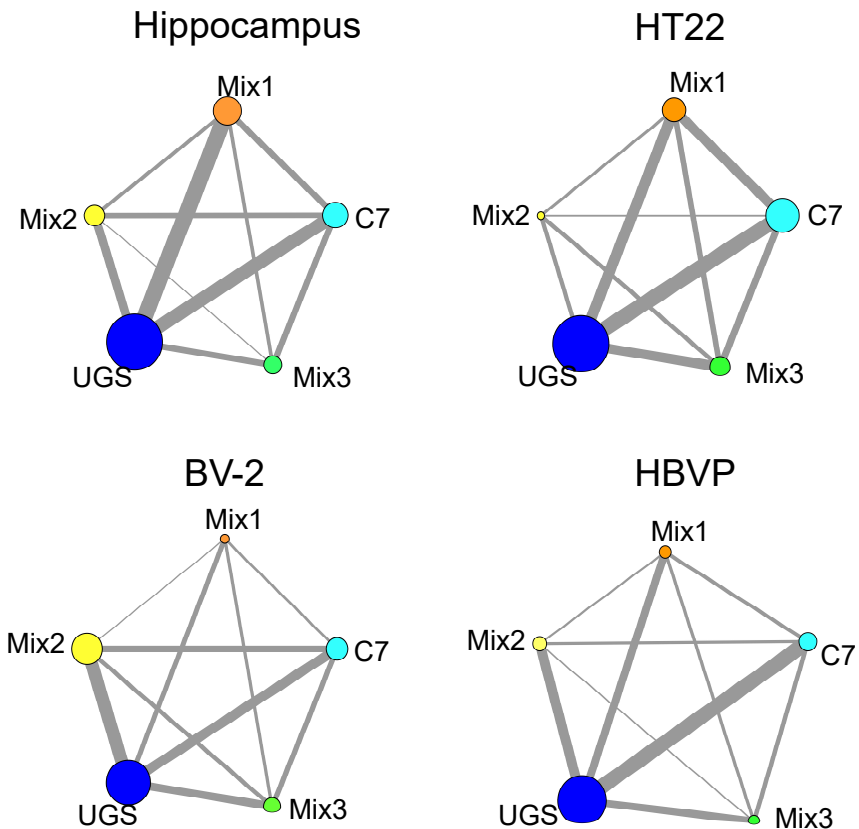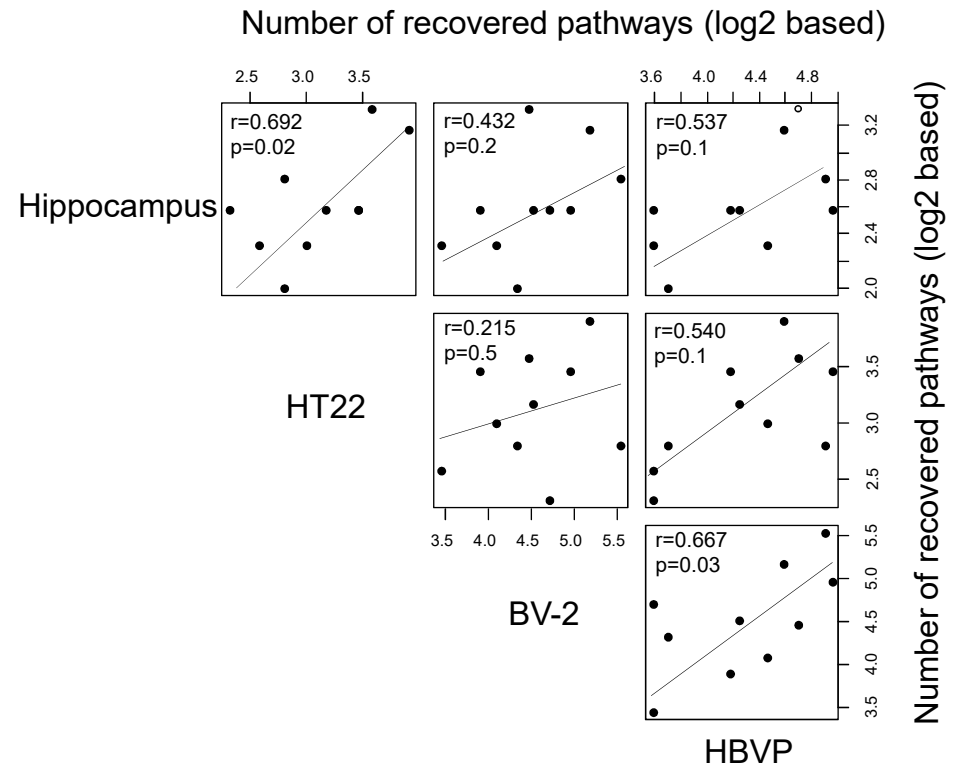

**Supplementary Fig. S8. Therapeutic similarities between neurovascular cells based on pathway activity.** Pathway activities from stimulated neurovascular cells were calculated by linearly combining the expression levels of the genes included in each pathway. As in the case of gene expression, by measuring the similarity between each pair of herbal components in terms of commonly recovered pathways, therapeutic networks were constructed. Differentially regulated pathways were selected as pathways with  $FDR \leq 0.01$  in stimulated neurovascular cells. Among such differentially regulated pathways, a 50% reduction in activity by herbal components was considered pathway activity recovery. Node size and edge thickness represent the number of pathways recovered by each herbal component, and the number of shared recovered pathways between two herbal components, respectively. The structure of the therapeutic network obtained from each neurovascular cell type was then compared with those from other cell types to obtain correlation patterns between neurovascular cell types.

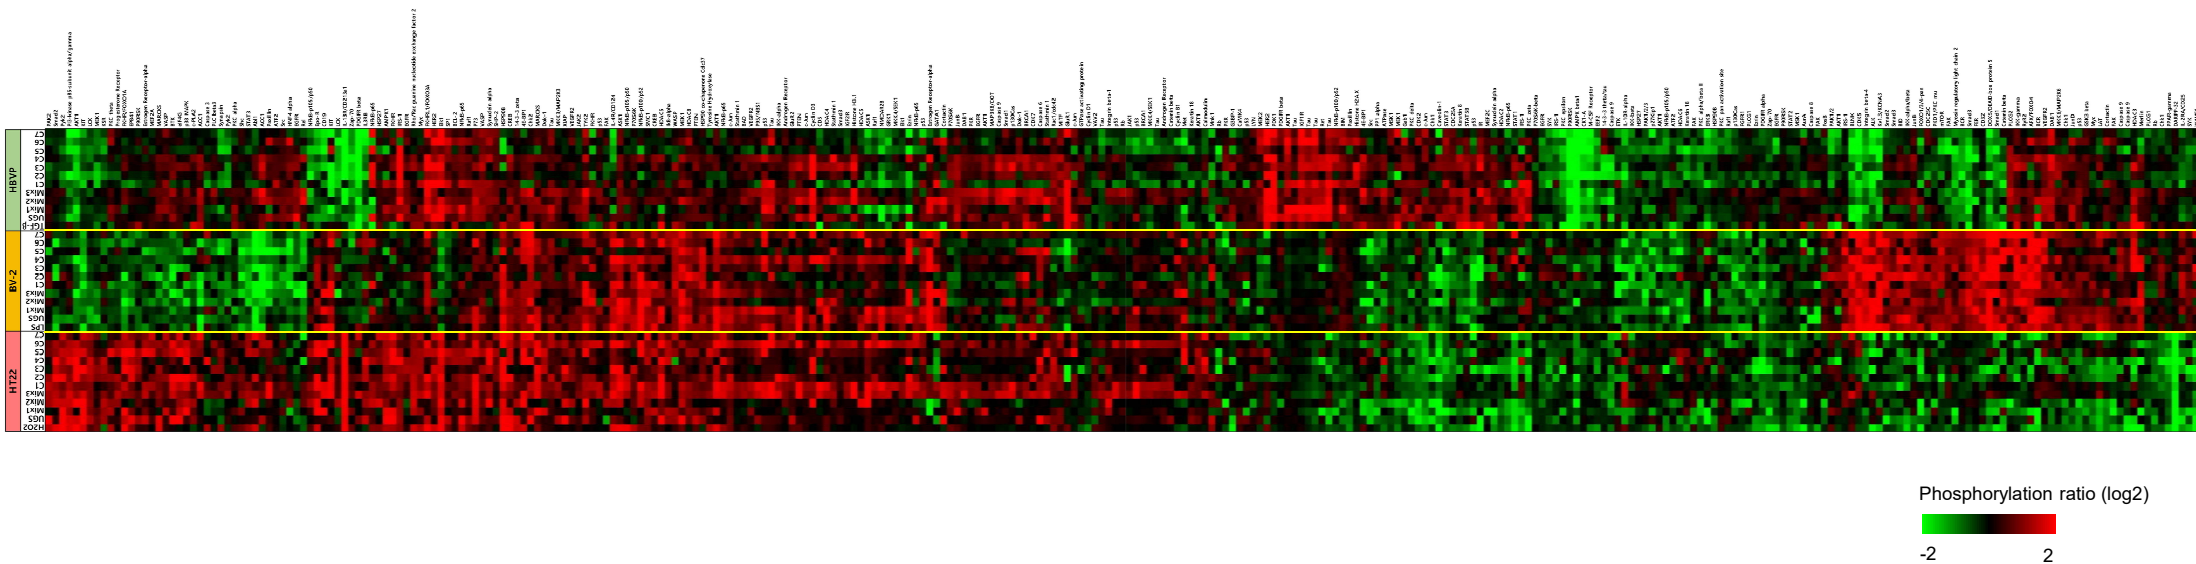

**Supplementary Fig. S9. Regulation of phosphorylation by UGS and its components.** The phosphorylation status of signaling proteins was measured using antibody array technology in stimulated neurovascular cells. Protein phosphorylation levels were compared with those of control samples to obtain phosphorylation ratios. A phosphorylation profile was obtained by hierarchically clustering approximately 310 proteins showing significant variation (standard deviation > 1.0) over all neurovascular cell types. The red and green colors reflect high and low protein phosphorylation, respectively, as indicated by the scale bar.

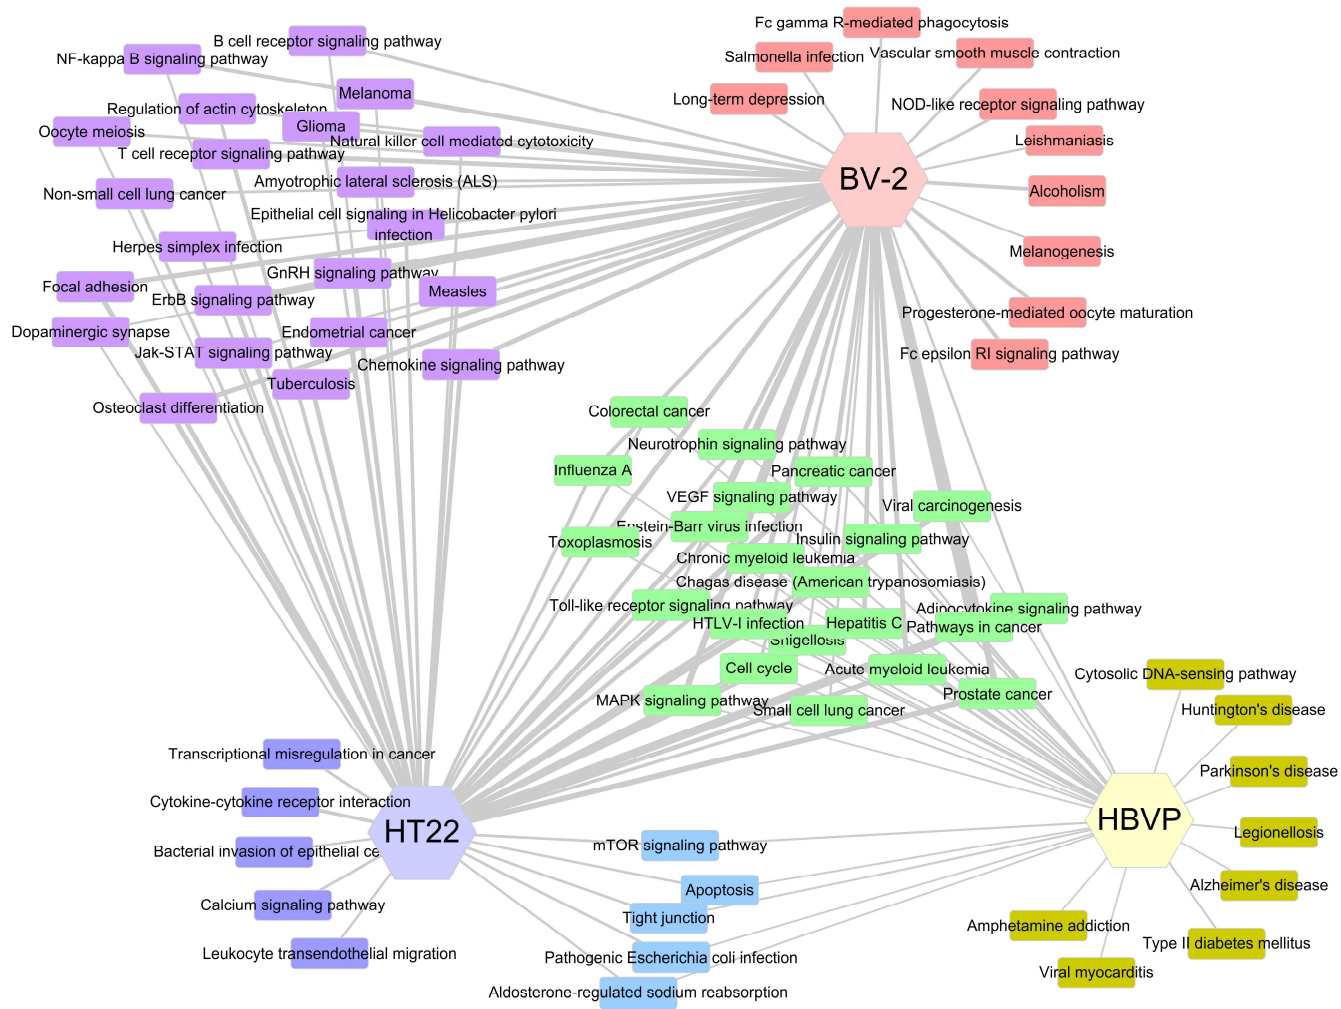

**Supplementary Fig. S10. Regulation of phosphorylation by UGS and its components.** The distribution of significant pathways (FDR < 0.01) from SPIA was displayed in connection with neurovascular cell types.

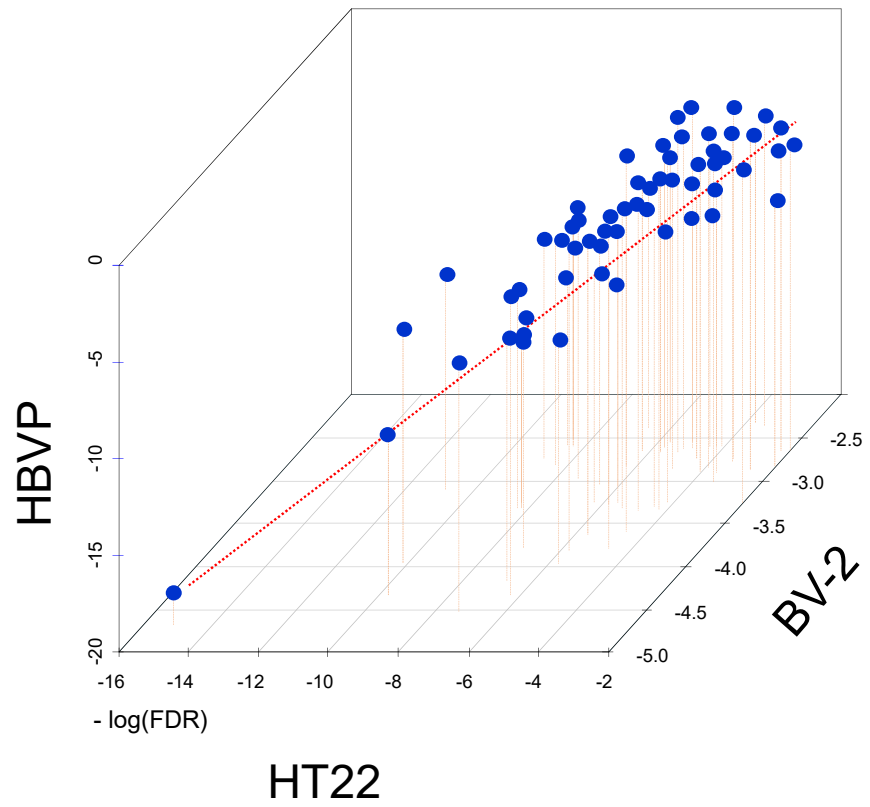

**Supplementary Fig. S11. Regulation of phosphorylation by UGS and its components.** Relationships between neurovascular cell types were measured in terms of their FDR values for common pathways (FDR < 0.01).

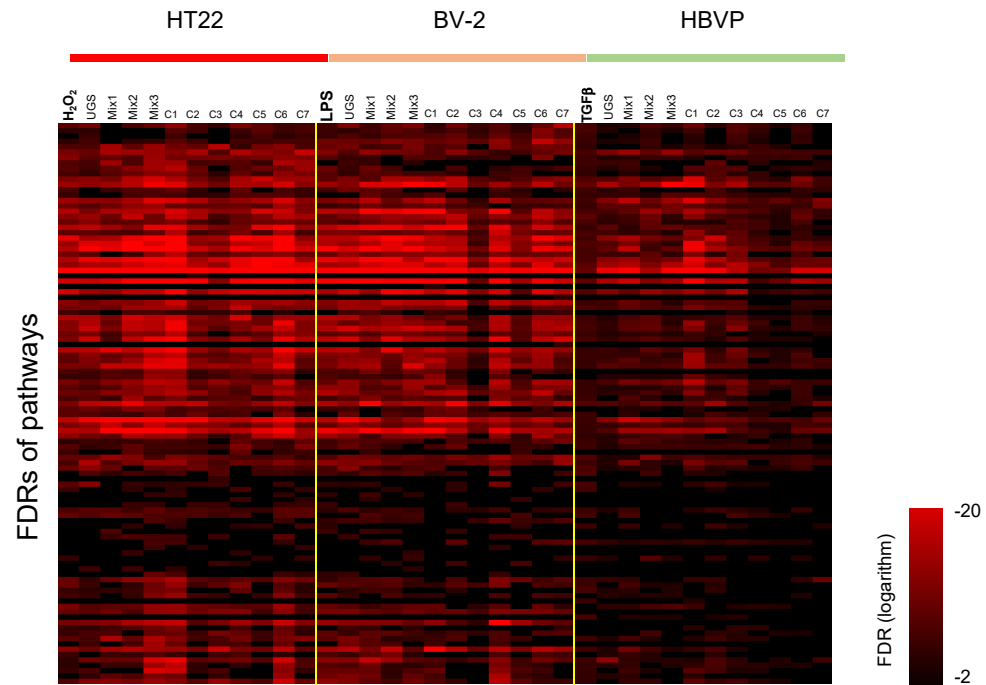

**Supplementary Fig. S12. Regulation of phosphorylation by UGS and its components.** Enriched phospho-based pathways (FDR < 0.01) from SPIA were hierarchically clustered based on FDR values.

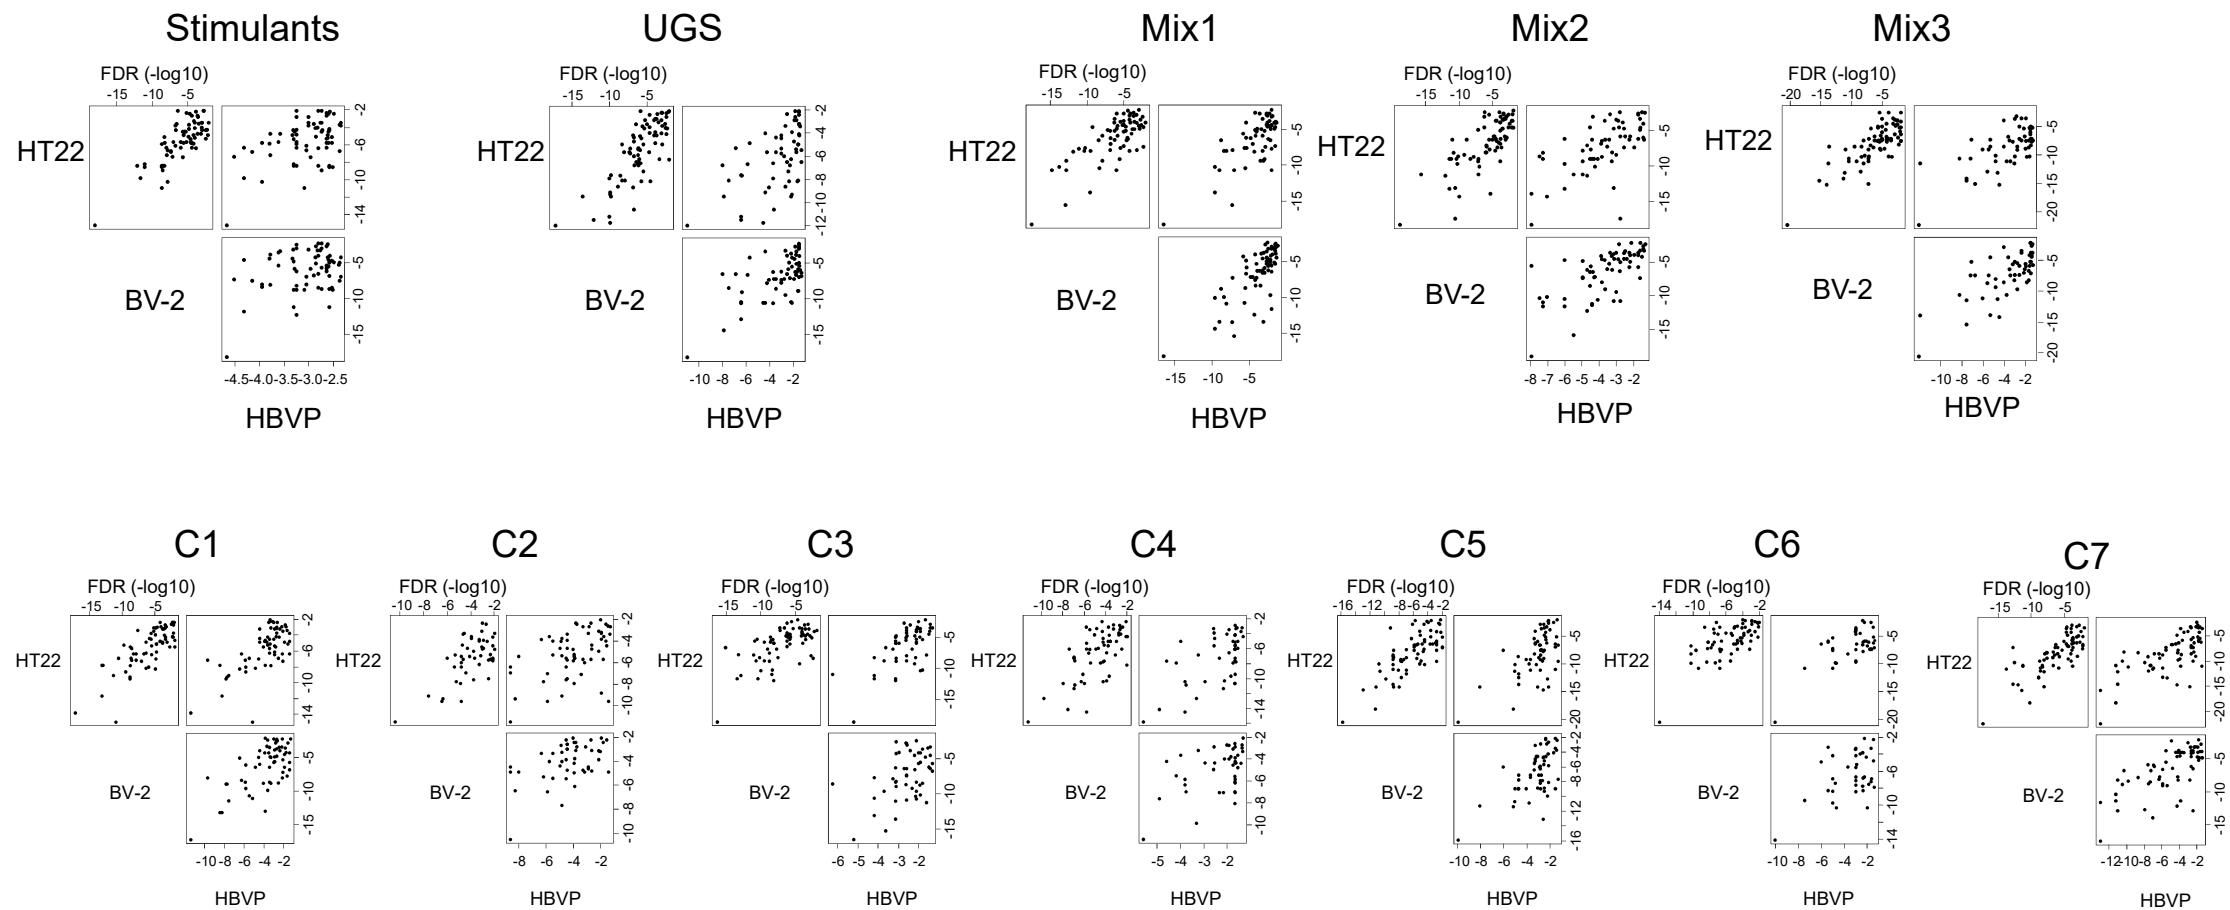

**Supplementary Fig. S13. Correlation patterns between neurovascular cell types based on FDR distribution.** Enriched phospho-based pathways (FDR < 0.01) in stimulated neurovascular cell types were identified with SPIA. On these enriched phospho-pathways, the effects of herbal components were measured in terms of FDR values. Correlation patterns among FDR values were then measured between neurovascular cell types.

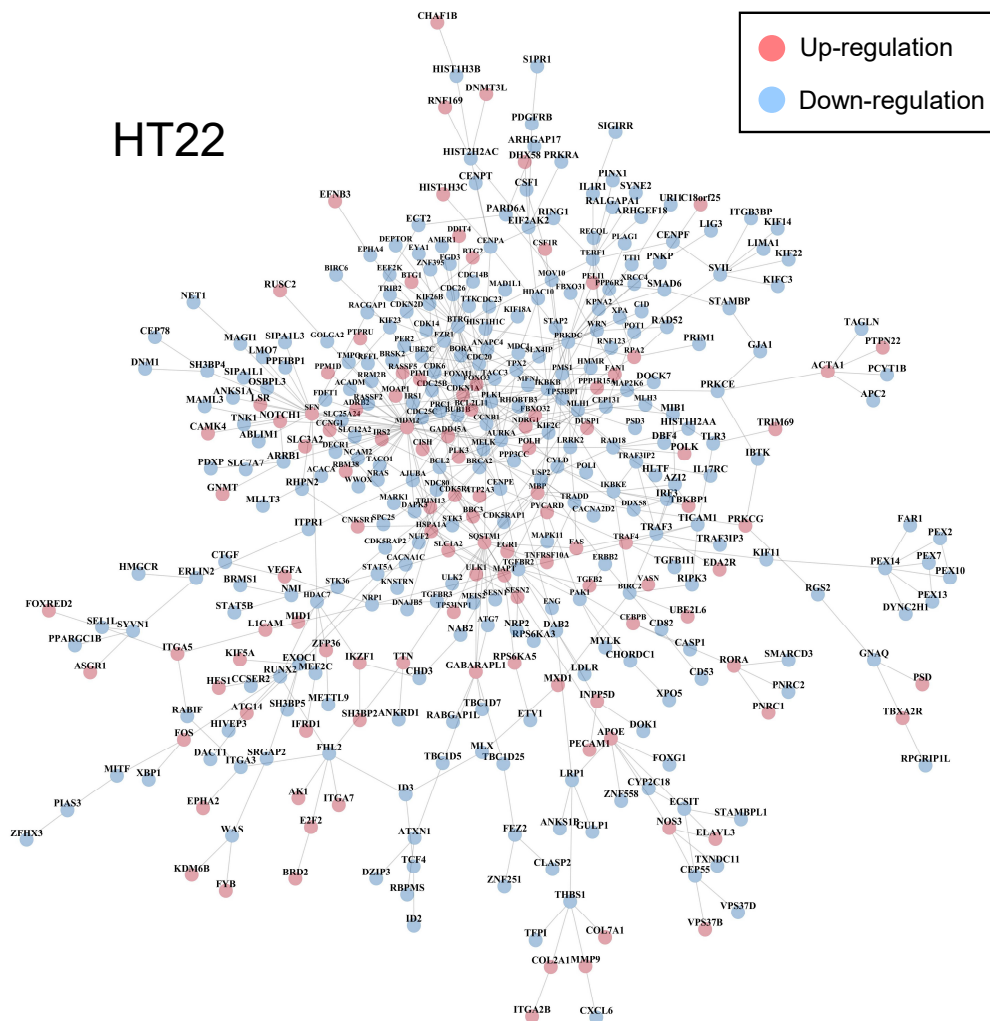

### BV-2

### HBVP

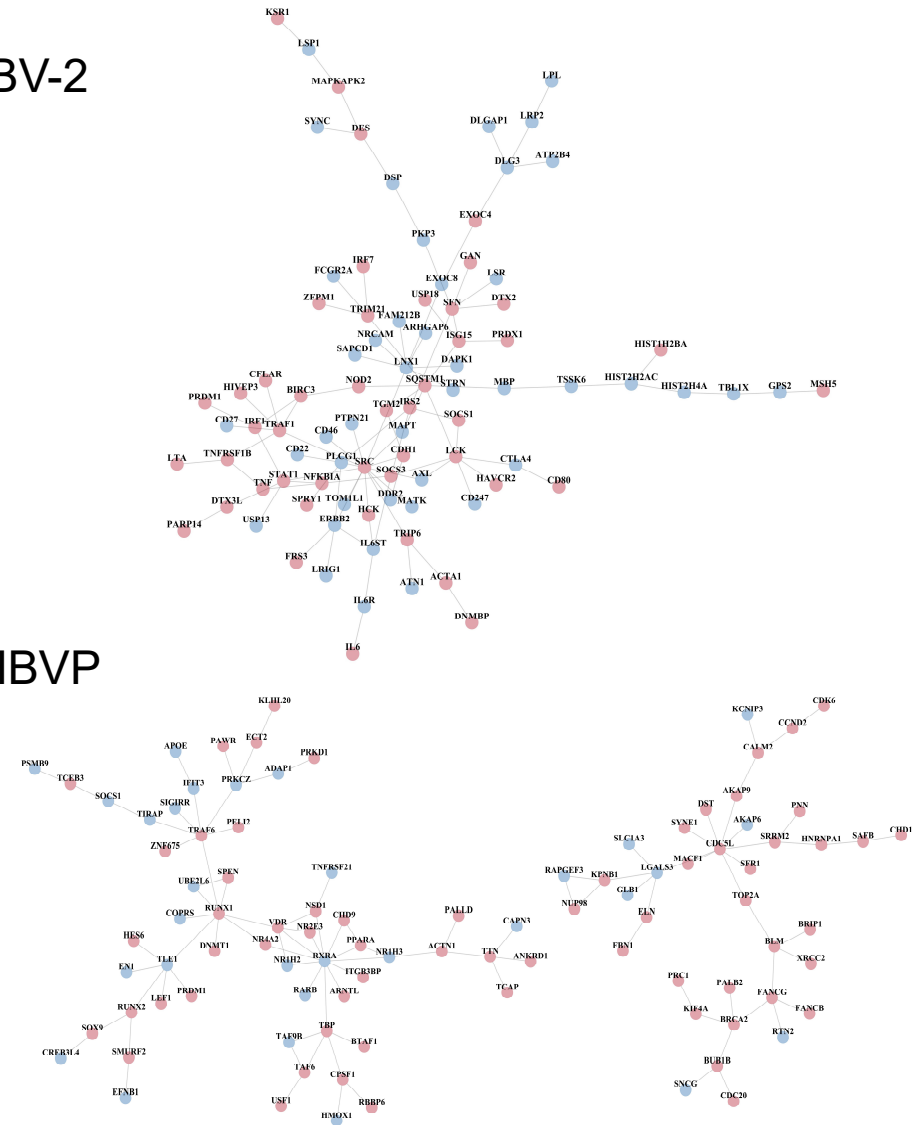

**Supplementary Fig. S14. Major modules from neurovascular cells.** Modules were identified with the Reactome FI Cytoscape plugin program, using the DEGs from each neurovascular cell type. Expression levels are depicted in red and blue for up- and downregulated genes, respectively.



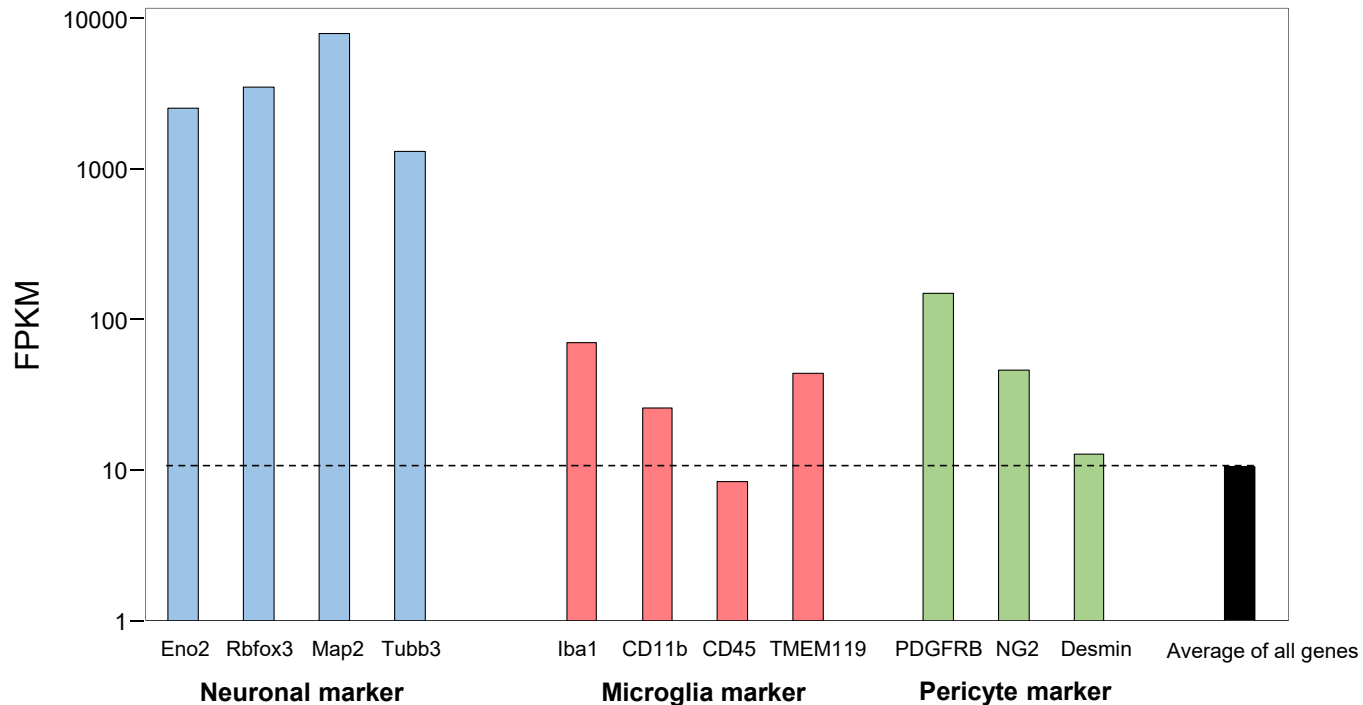

**Supplementary Fig. S15. Expressional levels of marker genes of neurovascular cells in hippocampal mouse tissues.** Neuronal markers, such as Eno2 (51), Rbfox3 (NeuN) (52), Map2 (53), and Tubb3 (54), were highly expressed when compared with markers of pericytes and A $\beta$ -activated microglia in hippocampal mouse tissues. Gene expression levels were measured by FPKM (Fragments Per Kilobase of transcripts per Million mapped reads) from QuantSeq analysis. Iba1, CD11b, CD45, and TMEM119 were used as markers of activated microglia. PDGFRB, NG2, and desmin were used as markers of pericytes. The averaged value for all spots of genes was used as a control.

51. Sensenbrenner, M., Lucas, M. & Deloulme, J. C. Expression of two neuronal markers, growth-associated protein 43 and neuron-specific enolase, in rat glial cells. *J. Mol. Med.* 75, 653–663 (1997).
52. Mullen, R. J., Buck, C. R. & Smith, A. M. NeuN, a neuronal specific nuclear protein in vertebrates. *Development* 116, 201–211 (1992).
53. Izant, J. G. & McIntosh, J. R. Microtubule-associated proteins: a monoclonal antibody to MAP2 binds to differentiated neurons. *Proc. Natl. Acad. Sci. U. S. A.* 77, 4741–4745 (1980).
54. Lee, M. K., Tuttle, J. B., Rebhun, L. I., Cleveland, D. W. & Frankfurter A. The expression and posttranslational modification of a neuron-specific beta-tubulin isotype during chick embryogenesis. *Cell Motil. Cytoskeleton* 17, 118–132 (1990).
